# Supplementary material for: LixFeF6 (x = 2, 3, 4) battery materials: structural, electronic and lithium diffusion properties
Source: Royal Society of Chemistry journal article supplement (doi:10.1039/c3cp53606h), 2013-01-01
Supplement: c3cp53606h.pdf [file c3cp53606h.pdf]

## Supplementary Information

SI-Tables 1, 2: Input and output lattice parameters GGA+U DFT calculations

Table SI-1. Lattice parameters of  $\alpha$ -Li<sub>3</sub>FeF<sub>6</sub>: Structural input for spinrelaxed calculations, U=5eV, k-mesh = 2x2x3, PW91 and refined lattice parameters.

| Magnetic moment Fe                                     | a [Å]   | b [Å]  | c [Å]   | V [Å <sup>3</sup> ] |
|--------------------------------------------------------|---------|--------|---------|---------------------|
| $\alpha$ -Li <sub>3</sub> FeF <sub>6</sub> , exp. [18] | 14,4277 | 8,6810 | 10,0441 | 1251,68             |
| 5 (d <sup>5</sup> ), HS <sup>#</sup>                   | 14,6560 | 8,7574 | 10,1666 | 1305,79             |
| 1 (d <sup>5</sup> ), LS                                | 14,5698 | 8,5815 | 10,2198 | 1277,12             |

Table SI-2. Lattice parameters of Li<sub>2</sub>FeF<sub>6</sub> and Li<sub>4</sub>FeF<sub>6</sub>: Structural input for spinrelaxed calculations, U=5eV, k-mesh = 2x2x3, PW91 and refined lattice parameters.

| Magnetic moment Fe                   | a [Å]   | b [Å]  | c [Å]   | V [Å <sup>3</sup> ] |
|--------------------------------------|---------|--------|---------|---------------------|
| Li <sub>2</sub> FeF <sub>6</sub>     | 14,7287 | 8,4933 | 9,6080  | 1201,92             |
| 4 (d <sup>4</sup> ), HS <sup>#</sup> | 14,9223 | 8,8165 | 10,0460 | 1313,21             |
| 2 (d <sup>4</sup> ), LS              | 14,9049 | 8,8113 | 9,9608  | 1310,37             |
| Li <sub>4</sub> FeF <sub>6</sub>     | 14,3781 | 8,4669 | 9,8088  | 1194,11             |
| 4 (d <sup>6</sup> ), HS <sup>#</sup> | 14,7798 | 8,7532 | 10,1721 | 1314,57             |
| 0 (d <sup>6</sup> ), LS              | 14,6891 | 8,5629 | 9,9603  | 1252,01             |

<sup>#</sup> refined/optimized lattice parameters of structures used for voltage and DOS calculations (lowest total energy)

Our calculations do not predict a magnetic moment on either the fluorine or lithium atoms.

SI tables 3: Voltage data

Table SI-3. Voltage data derived from total Energies of the most stable HS relaxed P1 structures.

| Structure                                      | Total Energy [eV] | Voltage [V] |
|------------------------------------------------|-------------------|-------------|
| HS-Li <sub>2</sub> FeF <sub>6</sub>            | -508,204572       | 6.11        |
| HS- $\alpha$ -Li <sub>3</sub> FeF <sub>6</sub> | -604,573591       |             |
| HS- Li <sub>4</sub> FeF <sub>6</sub>           | -663,039575       | 2.95        |

Referring to equation (1) in the manuscript: Metallic lithium was used to calculate the chemical potential of a single lithium atom using VASP:

$$\mu(\text{Li}) = -1.9177\text{eV}$$
